# Supplementary material for: Simulation of the mortality after different ex ante (secondary) and ex post (tertiary) triage methods in people with disabilities and pre-existing diseases
Source: Springer Nature journal article supplement (doi:10.1007/s00101-023-01336-7), 2023-09-21
Supplement: MOESM1 [file 26069608]

**Supplementary material to the article " Simulation of mortality after different ex-ante- (secondary) and ex-post- (tertiary) triage methods in people with disabilities and comorbidities" by Garber S, Brunner JO, Heller AR et al. (2023) in *Die Anaesthesiologie*.**

The article and additional material are available at [www.springermedizin.de](http://www.springermedizin.de). Please enter the title of the article in the search field.

**Table S1: Mortality (mean and standard deviation) per patient group, triage policy and point in time (real-world simulation)**

|                                                          | <i>t</i> | Policy 0        | Policy 1        | Policy 2        | Policy 3        | Policy 4        | Policy 5        |
|----------------------------------------------------------|----------|-----------------|-----------------|-----------------|-----------------|-----------------|-----------------|
| All patients                                             | 0        | 0.354<br>(0.06) | 0.354<br>(0.06) | 0.283<br>(0.06) | 0.282<br>(0.06) | 0.339<br>(0.06) | 0.338<br>(0.06) |
| Patients without impairments and pre-existing conditions | 0        | 0.160<br>(0.08) | 0.158<br>(0.08) | 0.160<br>(0.08) | 0.160<br>(0.08) | 0.157<br>(0.08) | 0.156<br>(0.08) |
| Patients with impairments and pre-existing conditions    | 0        | 0.437<br>(0.08) | 0.437<br>(0.08) | 0.348<br>(0.08) | 0.348<br>(0.08) | 0.428<br>(0.08) | 0.427<br>(0.08) |
| All patients                                             | 1        | 0.354<br>(0.06) | 0.292<br>(0.06) | 0.290<br>(0.06) | 0.253<br>(0.06) | 0.341<br>(0.06) | 0.279<br>(0.06) |
| Patients without impairments and pre-existing conditions | 1        | 0.159<br>(0.09) | 0.157<br>(0.08) | 0.161<br>(0.08) | 0.160<br>(0.08) | 0.157<br>(0.08) | 0.156<br>(0.08) |
| Patients with impairments and pre-existing conditions    | 1        | 0.438<br>(0.08) | 0.364<br>(0.08) | 0.358<br>(0.08) | 0.315<br>(0.08) | 0.429<br>(0.06) | 0.353<br>(0.06) |
| All patients                                             | 2        | 0.354<br>(0.06) | 0.256<br>(0.06) | 0.296<br>(0.06) | 0.233<br>(0.05) | 0.342<br>(0.06) | 0.245<br>(0.06) |
| Patients without impairments and pre-existing conditions | 2        | 0.159<br>(0.09) | 0.156<br>(0.07) | 0.161<br>(0.08) | 0.158<br>(0.07) | 0.158<br>(0.08) | 0.155<br>(0.07) |
| Patients with impairments and pre-existing conditions    | 2        | 0.438<br>(0.08) | 0.322<br>(0.08) | 0.366<br>(0.08) | 0.294<br>(0.08) | 0.430<br>(0.08) | 0.312<br>(0.08) |
| All patients                                             | 3        | 0.355<br>(0.06) | 0.234<br>(0.05) | 0.302<br>(0.06) | 0.219<br>(0.05) | 0.344<br>(0.06) | 0.225<br>(0.05) |
| Patients without impairments and pre-existing conditions | 3        | 0.160<br>(0.09) | 0.155<br>(0.07) | 0.160<br>(0.08) | 0.154<br>(0.07) | 0.158<br>(0.08) | 0.153<br>(0.07) |
| Patients with impairments and pre-existing conditions    | 3        | 0.438<br>(0.08) | 0.297<br>(0.08) | 0.374<br>(0.08) | 0.280<br>(0.08) | 0.431<br>(0.08) | 0.289<br>(0.08) |

**Table S2: Average number of ICU patients per patient group, triage policy and point in time (real-world simulation)**

|                                                          | <i>t</i> | Policy 0 | Policy 1 | Policy 2 | Policy 3 | Policy 4 | Policy 5 |
|----------------------------------------------------------|----------|----------|----------|----------|----------|----------|----------|
| Patients without impairments and pre-existing conditions | 0        | 18.0     | 18.0     | 21.0     | 21.0     | 19.7     | 19.7     |
| Patients with impairments and pre-existing conditions    | 0        | 42.0     | 42.0     | 39.0     | 39.0     | 40.3     | 40.3     |
| Patients without impairments and pre-existing conditions | 1        | 18.0     | 20.9     | 20.7     | 23.9     | 19.6     | 22.6     |
| Patients with impairments and pre-existing conditions    | 1        | 42.0     | 39.1     | 39.3     | 36.1     | 40.5     | 37.4     |
| Patients without impairments and pre-existing conditions | 2        | 18.0     | 23.8     | 20.4     | 26.6     | 19.4     | 25.6     |
| Patients with impairments and pre-existing conditions    | 2        | 42.0     | 36.2     | 39.6     | 33.4     | 40.6     | 34.5     |
| Patients without impairments and pre-existing conditions | 3        | 18.0     | 26.6     | 20.2     | 29.0     | 19.2     | 28.3     |
| Patients with impairments and pre-existing conditions    | 3        | 42.0     | 33.4     | 39.8     | 31.0     | 40.8     | 31.7     |
